# Supplementary material for: The feasibility of virtual reality therapy for upper extremity mobilization during and after intensive care unit admission
Source: PeerJ. 2025 Jan 9;13:e18461. doi: 10.7717/peerj.18461 (PMC11725268; doi:10.7717/peerj.18461)
Supplement: Supplemental Information 2 [file peerj-13-18461-s002.xlsx]

## Sheet: Raw data Table 5a
Raw data Table 5a: start_training and ICU characteristics and physical test outcomes at the start of VR-therapy and the follow-up visit
Patient number	Age	Gender	BMI	APACHE III	Frailty Score	Comorbidities	Adm_type	CPR	Sepsis	LOS ICU	LOS general ward	days on mechanical ventilation	total LOS hospital	LOS hospital before ICU admission	Dominant_hand	Maximum handgripstr start_training right hand	Maximum handgripstr start_training left hand	Relative handgripstr start_training right hand	Relative handgripstr start_training left hand	MMI score start_training	Maximum handgripstr follow-up right hand	Maximum handgripstr follow-up left hand	Relative handgripstr follow-up right hand	Relative handgripstr follow-up left hand	MMI score follow-up	VAS_probability of using in home situation start_training	VAS_probability of using in home situation follow-up
1	65	male	29.26	55	missing	yes	acute surgery	no	no	9	6	3	15	4	right	36.5	25.3	88.4	72.7	24	40.5	33.9	98.1	97.4	57	45	90
2	72	male	28.7	160	missing	no	medical	yes	no	9	4	7	12	9	left	35	35.2	102	120	24	39.6	39.6	116	135	57	40	missing
3	65	male	30.79	66	2	yes	medical	no	no	6	3	5	8	5	right	23.7	26.4	57.4	75.9	24	39.4	36.7	95.4	125	57	75	75
4	80	female	18.37	67	missing	no	acute surgery	no	no	5	6	3	12	6	right	11.9	11	61.7	64.3	20	10.4	9.4	53.9	55	36	25	25
5	54	female	15.43	75	3	no	medical	no	no	4	8	3	11	4	right	11.8	8.8	39.6	33.8	30	20.5	19.5	68.8	75	85	missing	missing
6	69	male	23.82	100	2	no	medical	yes	no	5	13	2	17	5	right	43.6	41.5	56.4	72.1	41	33.9	30.7	82.1	88.2	100	70	80
7	78	male	31.38	72	missing	yes	elective surgery	no	no	4	6	3	11	4	right	23.3	19.9	78.2	79.92	27	30.5	24.7	102.35	99.2	39	60	90
8	80	male	26.56	65	2	no	medical	no	no	4	4	3	7	4	right	23.8	25.1	79.87	100.8	53	11.9	19.4	39.93	77.91	85	30	30
9	55	female	27.68	103	missing	yes	medical	yes	no	8	18	7	25	11	right	26.3	27	101	126	74	31.5	25.7	121.15	119.53	85	70	80
10	74	male	25.31	105	3	no	acute surgery	no	yes	11	22	7	33	12	right	11.6	6.4	33.92	21.84	24	13	11	38	37.54	41	20	20

## Sheet: Raw data Table 5b
Raw data Table 5b: Training characteristics and game settings per training session
Patient number	Session number	Location	Duration	Game duration	Session efficiency	Level start training	Level end training	Number of played games	Borg score	VAS score satisfaction	Complaints during training	Description complaints	Completed training?
1	1	1	no training conducted	no training conducted	no training conducted	no training conducted	no training conducted	no training conducted	no training conducted	no training conducted	no training conducted		No, patient initiated
1	2	1	26	18.56	71.38	1	3	4	13	75	No		Yes
1	3	2	20	18.63	93.15	3	4	5	13	90	No		Yes
1	4	2	25	18.55	74.2	3	4	4	13	100	No		Yes
2	1	2	9	6.36	70.67	1	1	2	10	60	No		Yes
2	2	2	31	8.77	28.29	3	3	2	11	90	No		Yes
2	3	2	no training conducted	no training conducted	no training conducted	no training conducted	no training conducted	no training conducted	no training conducted	no training conducted	no training conducted		No, technical error
3	1	1	10	2.53	25.3	1	1	1	13	75	No		Yes
3	2	2	no training conducted	no training conducted	no training conducted	no training conducted	no training conducted	no training conducted	no training conducted	no training conducted	no training conducted		No, patient initiated
4	1	2	32	15.38	48.06	1	2	4	11	100	No		Yes
4	2	2	33	18.67	56.58	2	3	5	11	70	No		Yes
4	3	2	no training conducted	no training conducted	no training conducted	no training conducted	no training conducted	no training conducted	no training conducted	no training conducted	no training conducted		No, patient initiated
5	1	2	no training conducted	no training conducted	no training conducted	no training conducted	no training conducted	no training conducted	no training conducted	no training conducted	no training conducted	Fatigue	No, patient initiated
5	2	2	no training conducted	no training conducted	no training conducted	no training conducted	no training conducted	no training conducted	no training conducted	no training conducted	no training conducted	Fatigue	No, patient initiated
5	3	2	no training conducted	no training conducted	no training conducted	no training conducted	no training conducted	no training conducted	no training conducted	no training conducted	no training conducted	Fatigue	No, patient initiated
6	1	1	15	6.39	42.6	1	3	3	11	100	Yes	Pain due to surgery	Yes
6	2	2	20	training interrupted by care, no accurate measurement	training interrupted by care, no accurate measurement	3	3	2	11	80	Yes	Pain due to surgery	Yes
6	3	2	20	6.98	34.9	3	4	3	9	80	Yes	Pain due to surgery	Yes
7	1	2	25	18.13	72.52	1	2	2	7	80	No		Yes
7	2	2	32	21.94	68.56	3	4	2	9	90	No		Yes
7	3	2	40	14.79	36.98	3	4	3	9	90	No		Yes
8	1	2	20	12.93	64.65	2	3	3	13	50	Yes	Dizziness	Yes
8	2	2	18	9.5	52.78	3	3	2	9	75	Yes	Dizziness	Yes
8	3	2	no training conducted	no training conducted	no training conducted	no training conducted	no training conducted	no training conducted	no training conducted	no training conducted	no training conducted		No, patient initiated
9	1	2	30	10.08	33.6	3	3	3	7	100	No		Yes
9	2	2	20	16.65	83.25	4	3	2	11	80	Yes	Pain due to surgery	Yes
9	3	2	12	7.63	63.58	3	3	2	7	70	No		Yes
9	4	2	no training conducted	no training conducted	no training conducted	no training conducted	no training conducted	no training conducted	no training conducted	no training conducted	no training conducted		No, patient initiated
9	5	2	no training conducted	no training conducted	no training conducted	no training conducted	no training conducted	no training conducted	no training conducted	no training conducted	no training conducted		No, patient initiated
10	1	2	20	6.67	33.35	1	1	4	13	75	No		Yes
10	2	2	no training conducted	no training conducted	no training conducted	no training conducted	no training conducted	no training conducted	no training conducted	no training conducted	no training conducted		No, patient initiated
10	3	2	no training conducted	no training conducted	no training conducted	no training conducted	no training conducted	no training conducted	no training conducted	no training conducted	no training conducted		No, patient initiated
10	4	2	no training conducted	no training conducted	no training conducted	no training conducted	no training conducted	no training conducted	no training conducted	no training conducted	no training conducted		No, patient initiated
10	5	2	no training conducted	no training conducted	no training conducted	no training conducted	no training conducted	no training conducted	no training conducted	no training conducted	no training conducted		No, patient initiated
10	6	2	no training conducted	no training conducted	no training conducted	no training conducted	no training conducted	no training conducted	no training conducted	no training conducted	no training conducted		No, patient initiated
10	7	2	no training conducted	no training conducted	no training conducted	no training conducted	no training conducted	no training conducted	no training conducted	no training conducted	no training conducted		No, patient initiated

## Sheet: Descriptive metadata
Name variable	Description	Unit
Patient number	Study number assigned to patient during inclusion	NA
Age	Age of the participating patient at start of study	years
Gender	Gender as reported in the electronic patient file	Female/Male/Other
BMI	Body Mass Index at inclusion	kg/m2
APACHE III	Acute Physiology and Chronic Health Evaluation III, severity of illness first 24 hours of ICU admission	Score 0-299, higher is worse
Frailty Score	Clinical frailty scale score	Score 0-9, higher is worse
Comorbidities	Clinical comorbidities at ICU admission	NA
Adm_type	Type of ICU admission, medical/elective surgical/acute surgical	NA
CPR	Need for cardiopulmonary resuscitation	yes/no
Sepsis	Occurrence of sepsis at ICU admission	yes/no
LOS ICU	Length of stay ICU	days
LOS general ward	Length of stay general ward	days
days on mechanical ventilation	Days on mechanical ventilation in ICU	days
total LOS hospital	Length of stay hospital	days
LOS hospital before ICU admission	Length of stay hospital before ICU admission	days
Dominant_hand	Dominant hand	left/right
Maximum handgripstr start_training right hand	Maximum handgrip strength start VR-therapy of the right hand	kg, higher is better
Maximum handgripstr start_training left hand	Maximum handgrip strength start VR-therapy of the left hand	kg, higher is better
Relative handgripstr start_training right hand	Relative handgrips strength start VR-therapy of the right hand	% of norm
Relative handgripstr start_training left hand	Relative handgrips strength start VR-therapy of the left hand	% of norm
MMI score start_training	Morton mobility index scores start of VR-therapy	0-100, higher is better
Maximum handgripstr follow-up right hand	Maximum handgrip strength follow-up of the right hand	kg, higher is better
Maximum handgripstr follow-up left hand	Maximum handgrip strength follow-up of the left hand	kg, higher is better
Relative handgripstr follow-up right hand	Relative handgrips strength follow-up of the right hand	% of norm
Relative handgripstr follow-up left hand	Relative handgrips strength follow-up of the left hand	% of norm
MMI score follow-up	Morton mobility index scores follow up	0-100, higher is better
VAS_probability of using in home situation start_training	Visual Analogue Score probability of using VR-therapy in the home setting at start VR-therapy	0-100, higher is better
VAS_probability of using in home situation follow-up	Visual Analogue Score probability of using VR-therapy in the home setting at follow-up	0-100, higher is better
Session number	Consecutive number of session	NA
Location	Location of the performed VR-training	NA
Duration	Duration of the VR-training session	minutes
Game duration	Duration of the individual game played	minutes
Session efficiency	Efficiency of the session (the actual time spent using the VR-game/duration of VR-therapy session*100%)	%
Level start training	Starting level of game within a session	1-4
Level end training	Ending level of the game within a session	1-4
Number of played games	Total number of games played within a training session	NA
Borg score	Borg Rating of Perceived Exertion Scale after session	2020-06-01
VAS score satisfaction	Visual Analogue Score satisfaction with the VR-training session	0-100, higher is better
Complaints during training	Occurrence of complaints during the session	yes/no
Description complaints	String variable of complaints made during the training session	NA
Completed training?	Was the training competed?	yes/no
